1 **Health-seeking behavior and associated factors among community in**  
2 **Southern Ethiopia:Community based cross-sectional study guided by**  
3 **Health belief model.**

4 Health-seeking behavior of the community in low in-come countries

5 Likawunt Samuel Asfaw <sup>1\*</sup>, Samuel Yohannes Ayanto <sup>2</sup>, Yitagessu Habtu Aweke <sup>3</sup>

6 <sup>1</sup> Department of Nursing, Hosanna College of Health Sciences, Hosanna, Ethiopia.

7 <sup>2</sup>Department of Midwife, Hosanna College of Health Sciences, Hosanna, Ethiopia.

8 <sup>3</sup> Departments of Health information technology, Hosanna College of Health Sciences, Hosanna,  
9 Ethiopia.

10

11

12 **\*Corresponding Author**

13 Email: [samuelliku@gmail.com](mailto:samuelliku@gmail.com) (LSA)

14

15

16

17

18

19

20

21

22

23

## 24 Abstract

25 **Background:** Health-seeking behavior is a sequence of actions taken to promote health  
26 and prevent disease. Governments' expenditure to health is being improved in Ethiopia. In  
27 contrast, high disease burden and low health service utilization is observed. The low health  
28 service utilization could be due to low health-seeking behavior of the community. Thus, this  
29 study was aimed to determine the level of health-seeking behavior and associated factors in  
30 Hosanna town, Southern Ethiopia.

31 **Methods:** We used community-based cross-sectional study design among community (n= 443) in  
32 Hosanna town. The overall health-seeking behavior of study participants was assessed using the  
33 mean score of each of the dimensions (health promotion and disease prevention activities) as a  
34 cut-off value. Having a score above the mean on each of the target dimensions was equated with  
35 having a high level of health seeking behaviour. STATA 12 software package (Stata  
36 Corporation, College Station, Texas, 77845, USA) was used for descriptive and logistic  
37 regression analysis.

38 **Results:** About eighty five percent of (85.4%) participants had low level of health-seeking  
39 behavior. Males were about two folds more likely to have low level of health-seeking behavior  
40 than females (AOR: 1.8; CI 1.03–3.42). Widowed participants were about five times more likely  
41 to have low health-seeking behavior (AOR: 4.8; CI 2.1–17.1) when compared to married  
42 participants. Those participants who are illiterate were about five times more likely to have low  
43 health-seeking behavior than who completed higher education (AOR: 4.5; CI 1.16–17.8).

44 **Conclusion:** The study revealed low health-seeking behavior among the study participants in the  
45 study area. This finding suggested the need for urgent interventions to the health literacy  
46 packages of Ethiopia to enhance the health seeking behavior of the country.

47 **Keywords:** Disease prevention, Ethiopia, Health belief model, Health promotion, Health-seeking  
48 behavior, Hosanna, Leisure activities, Substance use

## 49 **Introduction**

50 Health is a comprehensive concept that encompasses all social and biological aspects of  
51 life and health-seeking behavior refers to a sequence of actions taken to promote health and  
52 prevent disease [1]. The health policies and strategies entail knowledge about health seeking  
53 behavior for health promotion, disease prevention and improve quality of life [1, 2]. The practice  
54 of health seeking behaviour has a marvelous potential to reduce the occurrence of disease,  
55 disability and death [1]. Healthcare utilization that is an immediate outcome of health seeking  
56 behaviour is also found to be important to get health counseling (family planning, antenatal care,  
57 growth monitoring), screening for chronic diseases, and adherence to effective treatment [3-5].  
58 However, we have learnt the growing of evidences in low health care utilization and increased  
59 disease burden [6-10].

60 Previous studies showed that Africa accounts for 22% of global disease burden and adult  
61 mortality rate 347 per 1000 population, which is the highest in the world [4]. Similarly, despite  
62 an improved access in physical health facilities and government expenditure on health, the  
63 burden of diseases was not successfully reduced and health service coverage is low in Ethiopia  
64 [7-11]. For instance, according to the WHO African health observatory report, the burden of  
65 diseases was 73.6% in Ethiopia in 2010 exceeding the African average (71.1%) [7]. Moreover,  
66 350 premature deaths from all causes and 14.8 crude death rate per 1000 of population was  
67 recorded in 2010 which is the highest in east Africa [9]. Concerning maternal health, one in 26

68 African mothers have chances of dying due to preventable pregnancy related complications. This  
69 is about 300 times higher than reported for developed nations [4].

70 Regarding service utilization, the Ethiopian demographic and health survey finding of 2011  
71 reported low level of health service utilization. More than four in five mothers did not receive  
72 antenatal care and only 10% of ill individuals due to all cause got treatment [8-10]. To the best of  
73 our understanding, the observed evidences does not reflect nature more deserving for high  
74 income countries than low income countries, rather the difference in level of health seeking  
75 behaviour in high and low income countries.

76 Ethiopia is currently experiencing an incidence of newly emerging and reemerging health  
77 problems and in state of transition [2, 3], that requires comprehensive health care policies and  
78 programs. Similarly, unlike to the traditional assumptions chronic non communicable (Diabetes  
79 Mellitus, Cardiovascular disorders, cancer) illnesses are not confined to people of developed  
80 countries [12-15].

81 Evidences show that socio-economic status, geographic settings, cultural issues, service quality,  
82 health system policy and procedures are among the factors affecting health-seeking behavior of  
83 the community [15-18]. Individuals who fail to get health information found to have lower health  
84 seeking behavior [17]. However, individuals having higher health seeking behavior could better  
85 prevent disease and promote health [18-20]. Healthcare-seeking behavior is a multifaceted effect  
86 and needs an appropriate investigation in order to provide knowledge that will help with the  
87 formulation of health care policies and programs. Thus, in this study we assessed the level of  
88 health seeking behaviors and associated factors in urban households.

## 89 **Methods**

### 90 **Study area and period**

91 The study was conducted in Hosanna town, the capital of Hadiya Zone, located at a  
92 distance of 232 kilometers southwest of Addis Ababa, the capital of Ethiopia. There were 16,707  
93 Households in the town [20].Community based cross-sectional study was carried out among  
94 residents of the town, in August 2013

### 95 **Sample size and sampling technique**

96 The sample size for our study was estimated by taking prevalence of health seeking behaviour  
97 (50%), 95% confidence level, 5% margin of error and 15% non-response rate. Consequently, the  
98 final sample size was determined to be 443participants.

$$n = \frac{Z_{\frac{\alpha}{2}}^2 P(1 - P)}{d^2}$$

$$100 \quad n = \frac{(1.96)^2 0.5(1 - 0.5)}{(0.05)^2} = 385 + (15\% * 385) = 443$$

101 The final sample size was proportionally allocated to sub-administrative units of the town.  
102 Sampling frame was created for each sub-unit and randomly generated numbers were used to  
103 select the households. Simple random sampling technique was used to selectthe households from  
104 each unit. From each of the selected households the head of the house hold was included in data  
105 collection.

106

### 107 **Data collection instrument and procedures**

108 The health seeking questionnaire, WHO STEPS instrument and global physical activity  
109 questionnaire (GPAQ) were modified and used for data collection. The modified instrument was

110 translated in to the local language, Amharic. Data were collected through self-administered using  
111 structured questionnaire. Following informed oral consent procedures, the head of the  
112 households were asked to complete at home level in a quiet corner away from the presence of  
113 other people and drop to box prepared. Each took approximately fifty minutes. Probes and  
114 clarifications were sought as deemed necessary. Two days training was provided for data  
115 collectors and supervisors regarding research ethics, data collection procedures and contents of  
116 the instrument to increase the quality of our data. Supportive supervision was carried out by the  
117 supervisors on a daily basis during the data collection period. The completed questionnaire had  
118 been checked daily for its completeness and consistency.

#### 119 **Variables and its measurement**

120 The dependent variable was health seeking behavior. It is a composite variable measured using  
121 model construct. The overall health-seeking behavior of study participants was assessed using  
122 the mean score of each of the following four dimensions;

123 **Actions taken when got ill:** The health seeking behaviour of participants for this dimension was  
124 obtained from the following questions; ‘during your last illness did you seek treatment?’ This  
125 question had the following response categories: ‘Yes if seek care from health facilities and or  
126 traditional healers’, ‘No did not seek treatment’.

127 **Screening for general health:** This dimension was assessed using the following questions with  
128 “Yes -coded as 1” or “No -coded as 0” responses; ‘have you ever checked your blood pressure to  
129 know the level of your blood pressure?, ‘Did you ever checked your blood sugar level to know  
130 the level of your blood sugar?’, ‘Have you ever tested for human immune deficiency virus (HIV)

131 infection for early care and treatment?’, ‘ Did you vaccinated children and any family member  
132 who is eligible for?’, ‘ Did you or member of your family monitor the growth of recent child in  
133 family?’, Did you or member of your family followed antenatal care for the resent pregnancy?’  
134 In this dimension participants having a score above the mean was equated with having high  
135 health seeking behaviour of screening for general health were coded as “Yes 1” and otherwise  
136 coded as ‘No 0’, indicating that they had low health seeking behaviour of screening for general  
137 health.

138 **Health oriented leisure activities:** The health seeking behaviour of participants of health  
139 oriented leisure activities was measured as high ‘Yes 1’ -if scored above the mean for questions  
140 of aerobic physical activities (walking, running, swimming, and bicycling) and health oriented  
141 leisure activities (playing tennis, jumping rope, lifting weight) or low level of health seeking for  
142 health oriented leisure activities ‘No 0’-if scores below the mean.

143 **Risk exposure:** Health seeking behaviour of participants of risk exposure disease was measured  
144 using the question, “Did you take alcohol?”, “Did you smoke tobacco products?”, and “Did you  
145 chew Khat?” with “yes” or “no” responses in both. Participants responded “Yes” to at least one  
146 of these questions were coded as ‘0’, indicating that they had high risk exposure and low health  
147 seeking behaviour.

148 Overall, having a score above the mean on each of the target dimensions was equated with  
149 having a high level of health seeking behaviour. The exposure variables included age, sex,  
150 education, occupation, marital status, family income, and distance from health facility.

151

152

### 153 **Data analysis techniques**

154 The collected data were cleaned and entered to Epi-Data version 3.2, and exported to STATA 12  
155 soft-ware package (Stata Corporation, College Station, Texas, 77845, USA)for analysis.  
156 Descriptive statistics and multivariable logistic regression were used to analyze the data.  
157 Candidate variables with P-value <0.2 in Bivariable model were entered to multivariable model  
158 to adjust for predictors. The 95% CI for the corresponding Odds Ratio (OR) was used to assess  
159 the degree of associations at (P<0.05) to declare significance.

### 160 **Definition of terms**

#### 161 **High health seeking behaviour**

162 Participants having a score above ( $\geq$ ) the mean on each of the target dimensions was equated  
163 with having a high level of health seeking behaviour

#### 164 **Low health seeking behaviour**

165 Participants having a score below the mean on each of the target dimensions was equated with  
166 having a high level of health seeking behaviour

### 167 **Ethics**

168 Institutional research ethics review committee of Hosanna College of Health Sciences approved  
169 and granted permission of this study. Informed verbal consent was obtained from all study  
170 participants before data collection after explaining the objectives of the research. In this research  
171 we obtained informed verbal consent from the research participants because all the data sought  
172 was associated purely with information rather than human samples or did not put participants on  
173 experiment, which needs national ethical approval in our context. We obtained ethical clearance



174 for the research to be conducted in this way. This is the reason why we obtained informed verbal  
175 consent than written.

## 176 **Results**

### 177 Characteristics of study participants

178 Total of 443 questionnaires were received, only 424 questionnaires were valid and  
179 included in analysis. Of the questionnaires deemed not valid, 4 respondents refused and the rest  
180 did not complete the questionnaire in that one subsection of the questionnaire omitted. The mean  
181 age of the study participants was  $33.8 \pm 11.4$  Standard deviation (SD) years. Pertaining to family  
182 size, in average five people living in one house. Of the 424 participants 51.3 % were males and  
183 61.6% were currently married [table 1-2].

184

185

186

187

188

189

190

191

192

193

194 Table 1: Socio-demographic characteristics of study participants

| Variables                 | Frequency | Percent (%) |
|---------------------------|-----------|-------------|
| <b>Sex</b>                |           |             |
| Male                      | 218       | 51.4        |
| Female                    | 206       | 48.6        |
| <b>Marital status</b>     |           |             |
| Married                   | 262       | 61.8        |
| Single                    | 84        | 19.8        |
| Divorced                  | 45        | 10.6        |
| Widowed                   | 33        | 7.8         |
| <b>Level of education</b> |           |             |
| No formal education       | 55        | 13          |
| Primary education         | 162       | 38.2        |
| Secondary education       | 109       | 25.7        |
| Higher education          | 98        | 23.1        |
| Total                     | 424       | 100.00      |

195

196

197

198

199

200

201

202

203 Table 2: Socio-demographic characteristics of study participants

| Characteristics             | Frequency | Percent (%) |
|-----------------------------|-----------|-------------|
| <b>Occupation</b>           |           |             |
| Government employee         | 144       | 34.0        |
| Non-Government employee     | 75        | 17.7        |
| Merchant                    | 117       | 27.6        |
| Farmer                      | 23        | 5.4         |
| Others                      | 65        | 15.3        |
| <b>House family live in</b> |           |             |
| Own                         | 282       | 30.4        |
| Rent                        | 129       | 66.5        |
| Other                       | 13        | 3.1         |
| <b>Monthly income</b>       |           |             |
| <18.5 USD                   | 75        | 17.7        |
| 18.5-36.5 USD               | 177       | 41.7        |
| 36.6-72.5 USD               | 120       | 28.3        |
| >72.6 USD                   | 52        | 12.3        |
| Total                       | 424       | 100         |

204

205

206

207

## 208 Health seeking behaviors

209 Table 3 shows health seeking behaviour of study participants. Accordingly, 397 (93.6%) took  
210 action when got ill. Of those who took action when got ill, 345 (86.9%) visited medical  
211 institutions, and 24(6.0%) use only traditional home remedies. Of the participants visited medical  
212 institutions, 139 (40.2%) preferred private clinics as their first choice, 106(30.4%) sought health  
213 care from Hospital, 82(23.7%) sought health care from pharmacy and only 18 (5.4%) sought  
214 health care from public health centers.

215 The study participants were also asked to rate their perceived health status and the self-rated  
216 perceived health status show 113 (26.7%) of participants felt very well, 110(25.9%) felt excellent  
217 and 17(4.0%) were unable to express their health status.

218 Only 72 (17.0%) of participants undertook screening for general health status and 352 (83.0%) of  
219 study participants did not to screening. Similarly, more than eighty percent (81.6%) participants  
220 did not undertook health oriented leisure activities. The general prevalence of health seeking  
221 behavior was 14.6% and 85.4% of study participants had low level of health seeking behaviour  
222 [table 4].

223

224

225

226

227

228 Table 3: Health-seeking behavior of study participants in Hosanna

| Characteristics                                | Number     | Percent (%)  |
|------------------------------------------------|------------|--------------|
| <b>Perceived health status of participants</b> |            |              |
| Excellent                                      | 110        | 25.6         |
| Very good                                      | 113        | 26.7         |
| Good                                           | 100        | 23.6         |
| Fair                                           | 51         | 12.0         |
| Bad                                            | 33         | 7.8          |
| Difficult to express                           | 17         | 4.0          |
| <b>Take action when got ill</b>                |            |              |
| Yes                                            | 397        | 93.6         |
| No                                             | 27         | 6.4          |
| <b>Reported actions taken when got ill</b>     |            |              |
| Visiting medical institutions                  | 345        | 86.9         |
| Use traditional medicine and home remedies     | 24         | 6.0          |
| Combination of both                            | 28         | 7.1          |
| <b>Medical institution of first choice</b>     |            |              |
| Private clinics                                | 139        | 40.2         |
| Hospital                                       | 106        | 30.7         |
| Health centers                                 | 18         | 5.4          |
| Pharmacy                                       | 82         | 23.7         |
| <b>Total</b>                                   | <b>424</b> | <b>100.0</b> |

229

230 Table 4: Health-seeking behavior of study participants in Hosanna

| Characteristics                                | Number     | Percent (%)  |
|------------------------------------------------|------------|--------------|
| <b>Take health oriented leisure activities</b> |            |              |
| Yes                                            | 78         | 18.4         |
| No                                             | 346        | 81.6         |
| <b>Reported reasons not to take leisure</b>    |            |              |
| Lack of knowledge                              | 157        | 45.4         |
| Lack of time                                   | 81         | 23.4         |
| Lack of access                                 | 87         | 25.1         |
| Others                                         | 21         | 6.1          |
| <b>Screened for general health</b>             |            |              |
| Yes                                            | 72         | 17.0         |
| No                                             | 352        | 83.0         |
| <b>Vaccination</b>                             |            |              |
| Yes                                            | 393        | 92.7         |
| No                                             | 31         | 7.3          |
| <b>Antenatal care for mother</b>               |            |              |
| Yes                                            | 401        | 94.6         |
| No                                             | 23         | 5.4          |
| <b>Health-seeking behavior</b>                 |            |              |
| Low                                            | 362        | 85.4         |
| High                                           | 62         | 14.6         |
| <b>Total</b>                                   | <b>424</b> | <b>100.0</b> |

231 Factors associated with health seeking behaviors

232 Table 5 presents the logistic regression model fitted to assess factors associated with health  
233 seeking behavior. Accordingly, marital status, sex and level of education were independently  
234 associated with health seeking behavior.

235 The odds of low health seeking behavior among widowed participants was 4.8 times higher than  
236 single ones (AOR = 4.8, CI: 2.1, 17.1). As shown in the adjusted model, the likelihood of low  
237 health seeking behaviour was significantly higher in male than female (AOR = 1.8, CI: 1.04,  
238 3.42).

239 Similarly, in this study the association between level of education and health seeking behaviour  
240 was statistically significant ( $P < 0.05$ ), indicating that participants having no formal education had  
241 low health seeking behaviour compared to those having higher education (AOR = 4.5, CI: 1.16,  
242 17.8).

243

244

245

246

247

248

249 Table 5: Variables associated with health-seeking behavior

| Variables                 | Health-seeking behavior |          | Multivariate OR<br>(95%CI) | P-value           |
|---------------------------|-------------------------|----------|----------------------------|-------------------|
|                           | Low (%)                 | High (%) |                            |                   |
| <b>Sex</b>                |                         |          |                            |                   |
| Male                      | 184(89.3)               | 22(10.7) | 1.8(1.04,3.42)             | 0.02 <sup>†</sup> |
| Female                    | 178(79.8)               | 40(18.3) | 1                          |                   |
| <b>Marrital status</b>    |                         |          |                            |                   |
| Married                   | 218(83.2)               | 44(16.8) | 1                          |                   |
| Single <sup>‡</sup>       | 69(82.1)                | 15(17.9) | 2.1(0.9,12.5)              | 0.21              |
| Divorced                  | 43(95.6)                | 2(3.0)   | 4.2(1.1,21.1)              | 0.03 <sup>†</sup> |
| Widowed                   | 32(97.0)                | 1(3.0)   | 4.8(2.1,17.1)              | 0.02 <sup>†</sup> |
| <b>Level of education</b> |                         |          |                            |                   |
| Can't write or read       | 47(85.5)                | 8(14.5)  | 4.5(1.16,17.8)             | 0.02 <sup>†</sup> |
| Primary                   | 139(85.8)               | 23(14.2) | 1.4(0.50,4.20)             | 0.48              |
| Secondary                 | 89(81.7)                | 20(18.3) | 2.1(0.8,5.7)               | 0.12              |
| Higher education          | 87(88.8)                | 11(11.2) | 1                          |                   |

250 ‡=Not ever married †=P-value <0.05 1=Reference

251



## 252 Discussion

253 Many evidences suggest that addressing health seeking behavior pave ways for  
254 appropriate utilization of health care services [19]. This study tried to measure health-seeking  
255 behavior in multidimensional approaches to improve specific health behavior change to prevent  
256 disease and promote health. Based on our measure, the study showed that majority (85.4%) of  
257 participants had low level of health-seeking behavior. The extent of health-seeking behavior of  
258 the current study was remarkably low when compared to different parts of the world [1,2]. This  
259 finding was consistent with findings reported for mothers' health care seeking behavior for child  
260 health illness in Dera district, North Shewa zone in Oromiya regional state of Ethiopia [16]. In  
261 any case, this finding implies that significant behavioral interventions are needed to improve  
262 health-seeking behavior so that increase health service utilization coverage in the community.

263 About 93.6% participants in our study took actions and seek medical help when got ill, which is  
264 more than reported in South Africa, 76.5% [3]. Our data also showed that 40.3% of participants  
265 primarily chose private clinics when they seek medical help. This finding is similar with a study  
266 reported in Ethiopia [3].

267 A decision made against maternal and child health care utilization was also used as an indicator  
268 for health seeking behavior. Accordingly, the result showed that it was 94.6% for maternal and  
269 92.7% for child health care conditions. This is incomparably higher than findings of  
270 demographic and health survey(DHS)of 2011 in Ethiopia [20]. This could be due to the fact that  
271 our sample consisted of participants entirely from the urban setting unlike DHS that encompasses  
272 both urban and rural regions throughout the country.

273 Socio-demographic characteristics of household heads were tested for association. The results  
274 illustrated that sex, marital status and level of education showed an association with health-

275 seeking behavior. Male had low score of health-seeking behavior compared to their counterparts.  
276 This finding was in line with study reported in Stockholm [22, 24]. Socially, women are more  
277 responsible for their family, often stay longer time in home and take time to identify their health  
278 problems. Observations claimed that women are sensitive to their health. Conversely, men stay  
279 longer time out of door and busy in social matters representing their family in Ethiopia.

280 Pertaining to the influence of marital status to health seeking behaviour, divorced and widowed  
281 participants had low health-seeking behavior in our study. This finding was consistent with study  
282 reported for Jamaica in 2009 [19, 25]. Participants reported lower level of education had low  
283 health-seeking behavior. Most of the reports from Ethiopia and other countries supported this  
284 finding [25-27]. Consistencies in findings imply the influence of level of education on health  
285 seeking behaviour.

286 The present study has some relevant limitations that impede the power. One of the limitations of  
287 this study is related to the cross-sectional study design, in which the temporal relationships  
288 between the outcome and predictor variables cannot be established. Moreover, the sample was  
289 limited to single population which can limit the power of the study. We recommend an  
290 exhaustive exploration of the factors associated with health seeking behaviour in Ethiopia.

## 291 **Conclusion**

292 In conclusion, our findings agreed with the findings of previous studies. The overall  
293 health seeking behavior of households was low. Specially, taking health oriented leisure  
294 activities and screening for general health was incredibly low in the community. This cues to  
295 work on promotion of healthcare on the health seeking behaviour of the population of the

296 country. Majority of the population take action when get ill and underestimated the value of  
297 screening for general health and health oriented leisure activities. Further consideration should  
298 also be given for the risk factors including sex, marital status and level of education. Health  
299 literacy packages considering the identified differences may be designed to enhance awareness  
300 of the community about the need of health seeking behavior.

## 301 **Acknowledgements**

302 The authors would like to thank Hosanna College of Health Sciences Research and  
303 community service for financing and supervising the overall activities of the research. We are  
304 also grateful for Hosanna town residents, data collectors and Hosanna town health office for their  
305 cooperation during the entire process of data collection.

## 306 **References**

- 307 1. World Health Organization. Health promotion glossary of terms. Geneva 1997. Available  
308 from: <http://www.who.ch/hep.pdf> Accessed 30 December 2013.
- 309
- 310 2. WHO. World Health statistics. Geneva; 2013.
- 311
- 312 3. USAID. Evaluation of Africa's health in 2010.
- 313
- 314 4. WHO. World health statistics global health indicators. Geneva; 2012.
- 315
- 316 5. Kevany S, Murima O, Singh B, Hlubinka D, Kulich M, Morin SF et.al. Socioeconomic  
317 status and health care utilization in rural Zimbabwe: findings from project Accept (HPTN  
318 043). Journal of public health in Africa 2012; 3: e13.

- 319 6. World Health Organization. Atlas of African health statistics 2012: Health situation  
320 analysis of the African region. Available from: <http://www.aho.who.int/html> Accessed 30  
321 December 2012.
- 322
- 323 7. WHO. African health observatory Ethiopia: Health statistics profile 2010. Available  
324 from: <http://www.aho.afro.who.int/html> Accessed 30 December 2012.
- 325
- 326 8. Ministry of Health [MOH] [Ethiopia]. Health Sector development program (HSDP IV)  
327 2010/11-2014/2015. Addis Ababa, Ethiopia.
- 328
- 329 9. Ministry of Health [Ethiopia]. Overview of the sector factsheet 2011. Available from:  
330 [www.moh.gov.et/English/information/pages/Factsheet.aspxhtml](http://www.moh.gov.et/English/information/pages/Factsheet.aspxhtml) Accessed 30 December  
331 2012.
- 332
- 333 10. UNFPA. Maternal health care seeking behavior in Ethiopia: Findings from EDHS  
334 2005. Addis Ababa; 2008.
- 335
- 336 11. Tey NP, Lai SL. Correlates of and barriers to the utilization of Health services for  
337 delivery in South Asia and Sub-Saharan Africa. The scientific world journal 2013; DOI:  
338 10.1155/2013/423403.
- 339
- 340 12. Peng Y, Chang W, Zhou H, Hu H, Liang W. Factors associated with health-seeking  
341 behavior among migrant workers in Beijing, China. MBC health service research  
342 2010; Doi: 10.1186/1472-6963-10-69.
- 343

- 344 13. Sheikh BT, Hatcher J. Health seeking behavior and health service utilization trends in  
345 National Health survey of Pakistan: What needs to be done ?*J Pac Med Ass* 2007; 57  
346
- 347 14. Wacker M, Holle R, Heinrich J, Ladwig KH, Peters A, Leidl R, et.al. The association of  
348 smoking status with health care utilization, productivity loss and resulting costs: results  
349 from the population based KORA F4 study. *BMC Res Notes*2013; 13.
- 350 15. Hoeven MV, Kruge A, Greef M. Differences in Health care seeking behavior between  
351 rural and urban communities in South Africa. *International Journal for equity in Health*  
352 2012. Available from: <http://www.equityhealthj.com/content/11/1/31> Accessed 20  
353 February 2013.
- 354
- 355 16. Tsion A, Tefera B, Tegegn A, Deribew A. Mothers Health care seeking behavior for  
356 childhood illnesses in Dera district ,NorthShoa Zone, Oromia Regional state ,Ethiopia.  
357 *Ethiop J Health Sci* 2008; 18.
- 358
- 359 17. Rahman M, Islam MM, Islam MR., Madhya G, Latif MA. Disease pattern and Health  
360 Seeking Behavior in Rural Bangladesh. *Faridpur Med. Coll. J.* 2011; 5.
- 361
- 362 18. Iyalomhe GBS, Iyalomhe SI. Health-Seeking Behavior of Rural Dwellers in Southern  
363 Nigeria: Implications for Health care professionals. *International Journal of Tropical*  
364 *disease & Health* 2012; 2.
- 365
- 366 19. Bourne PA. Socio-demographic determinants of health care seeking behavior , self  
367 reported illness and self-evaluated health status in Jamaica . *International Journal of*  
368 *Collaborative research on internal medicine and public health* 2009; 1:101-130.

- 369
- 370 20. Central statistical Agency Ethiopia. Demographic and Health survey 2011. Ethiopia and  
371 Calverton , Maryland and USA, Addis Ababa: 2011
- 372
- 373 21. Higgins O, Sixsmith J, Barry MM, Domegan C. A Literature review on health  
374 information seeking behavior on the Web: a health consumer and health professionals  
375 perspectiveStockholm : ECDC; 2011. Doi: 10.2900/5788.
- 376
- 377 22. Birhanu Z, AbdissaA,Belachew T, Deribew A, SegniH,Tsu V *et al.* Health seeking  
378 behavior for cervical cancer in Ethiopia: a qualitative study. International journal for  
379 equity in Health 2012; 11:83. Doi: 10.1186/1475-9276-11-83.
- 380 23. Tessema F, Assefa M, Ayele F. Mothers' health services utilization and health care  
381 seeking behavior during infant rearing: A longitudinal community based study,  
382 Southwest Ethiopia. Ethiop. J. Health Dev. 2002; 16.
- 383
- 384 24. Kasse Y, Jasseh M, Corrah T, Donkor SA, Antonnio M, Adegbola RA, et al. Health  
385 seeking behavior, health system experience and tuberculosis case finding in Gambians  
386 with cough. BMC Public Health 2006; 6:143. DOI: 10.1186/1471-2458-6-143.
- 387
- 388 25. Waweru LM, Kabiru EW, Mbithi JN, Some ES. Health Status and Health Seeking  
389 Behavior of the elderly persons in Dagoretti divisions, Nairobi. East African Medical  
390 Journal 2003; 80.

391

- 392 26. Burton D, Flannery B, Onyango B, Larson C, Alaii J, Zhang X, et al. Health seeking  
393 behavior for common infectious diseases-related illnesses in Rural Kenya: A community-  
394 based House –to – House survey. *J Health Popul Nutr* 2011; 29.
- 395 27. Feinberg I, Frijters J, Johnson-Lawrence V, Greenberg D, Nightingale E, Moodie C.  
396 Examining Associations between Health Information Seeking Behavior and Adult  
397 Education Status in the U.S.: An Analysis of the 2012 PIAAC Data. Zeeb H, ed. *PLoS*  
398 *ONE*. 2016; 11(2):e0148751. doi:10.1371/journal.pone.0148751.

## 399 **Supporting information**

400 S1 Fig. Data collection tool

401

402

403

404

405

406

407

408

409

410

411

412
